# Supplementary material for: Spatially Uniform ReliefF (SURF) for computationally-efficient filtering of gene-gene interactions
Source: Springer Nature journal article supplement (doi:10.1186/1756-0381-2-5), 2009-09-22

# Population Size: 3200

## 99th percentile

## 90th percentile

## 75th percentile

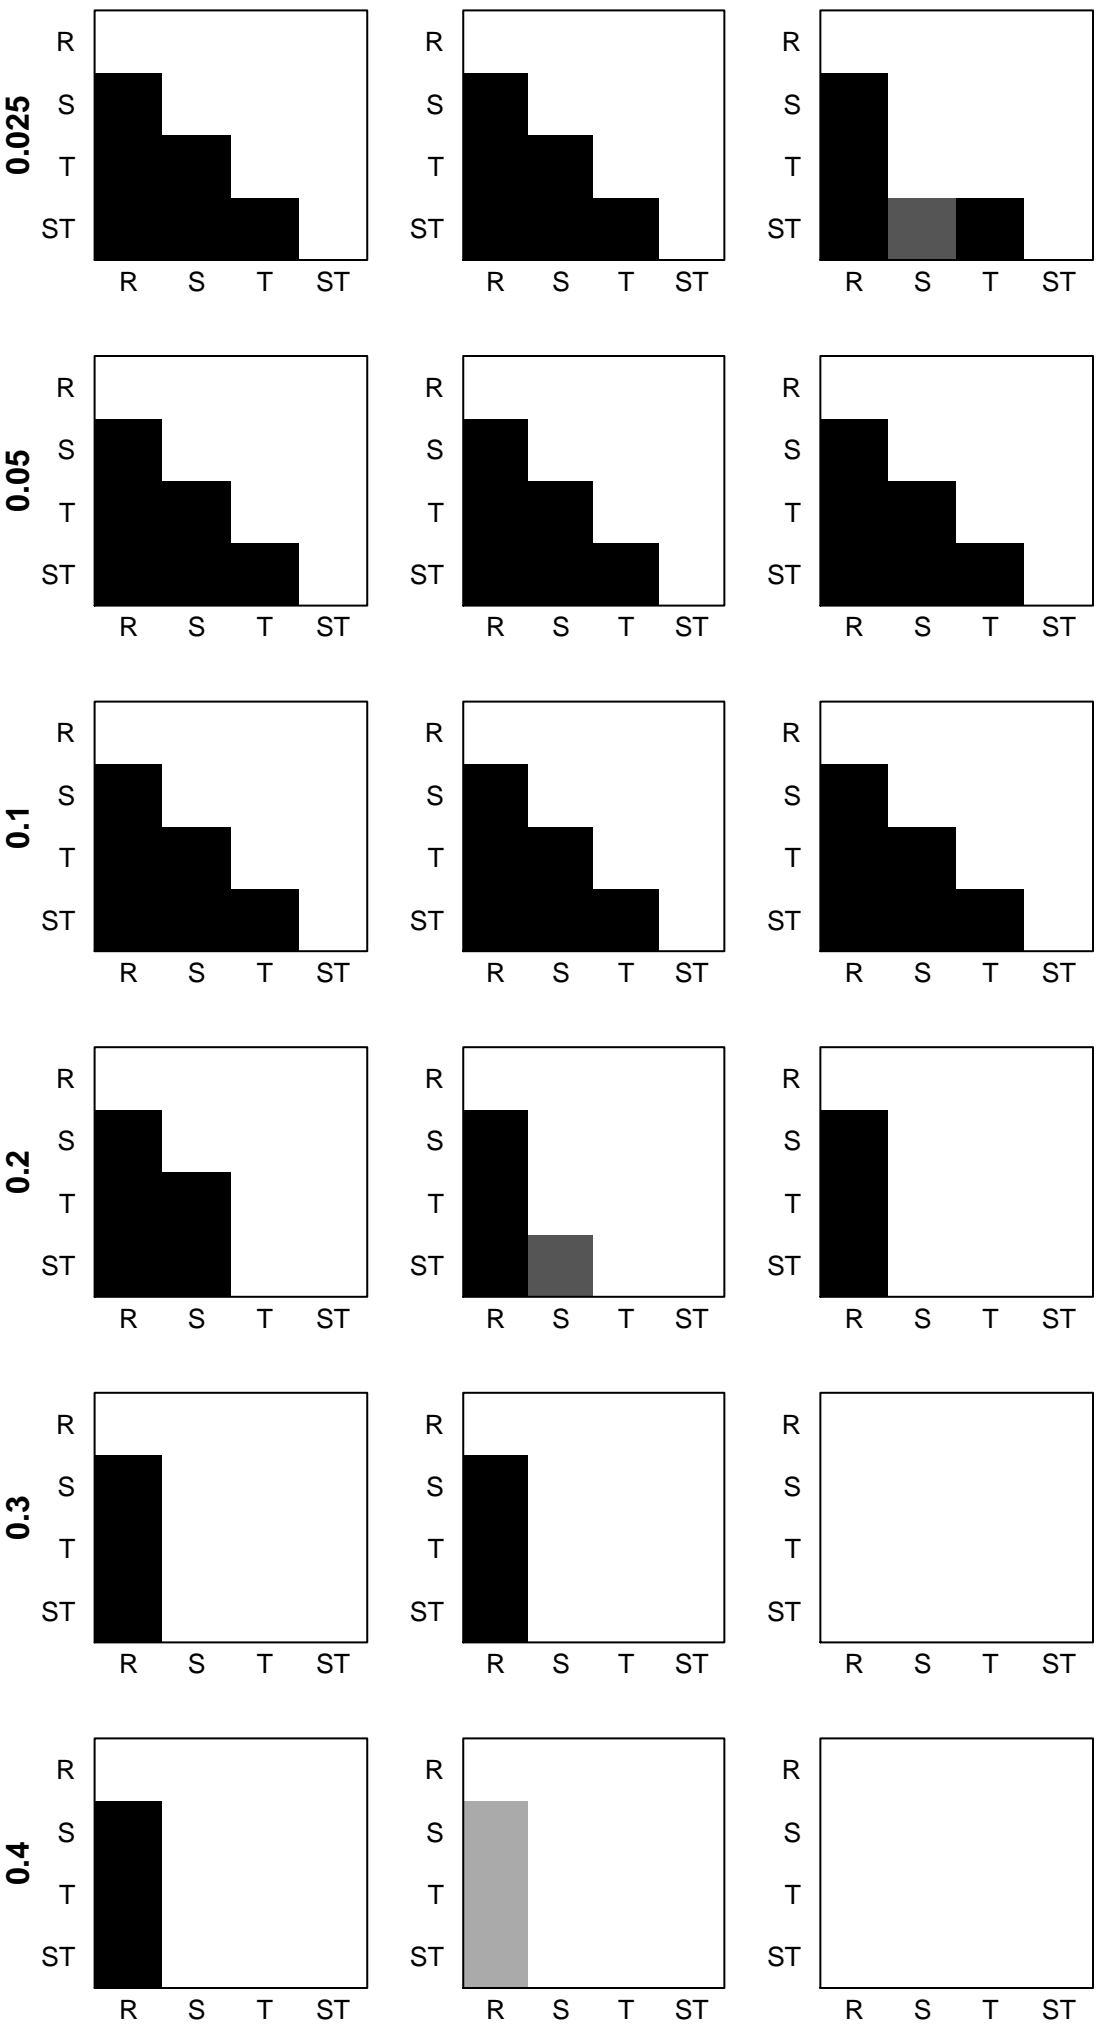

Supplement: 13040_2009_17_MOESM5_ESM.pdf [file 13040_2009_17_MOESM5_ESM.pdf]
